# Supplementary material for: The Diabetic Phenotype in HNF4A Mutation Carriers Is Moderated By the Expression of HNF4A Isoforms From the P1 Promoter During Fetal Development
Source: Oxford University Press journal article supplement (doi:10.2337/db07-1742), 2008-03-21
Supplement: db071742-sup-supplementarytableassaydetails.doc [file db071742-sup-supplementarytableassaydetails.doc]

Supplementary Table 1: The sequences of HNF4A probes and Primers used in this study. 6-FAM is 6-fluorescein, MGB is minor groove binding protein.

| **Probe Set 1** | **Probe or Primer Sequence** | **Label** |
| --- | --- | --- |
| 1A/2F  1A/2R  1A/2P | 5’ GGAATTTGAGAATGTGCAGGTGTTG 3’  5’ TGAGGTTGGTGCCTTCTGATG 3’  5’ ACGATGGGCAATGACACGT 3’ | None  None  5’ 6-FAM. 3’ MGB |
| 1A/1CF  1A/1CR  1A/1CP | 5’ AGAATGTGCAGGTGTTGACGAT 3’  5’ CCAAGCAGAGCCACTGTGA 3’  5’ CAATGGCCCTTCCAGTCCT 3’ | None  None  5’ 6-FAM. 3’ MGB |
| 1D/2F  1D/2R  1D/2P | 5’ GCCATGGTCAGCGTGAAC 3’  5’ CGTTGAGGTTGGTGCCTTCT 3’  5’ TTCTTACGACACGTCCCCATC 3’ | None  None  5’ 6-FAM. 3’ MGB |
| **Probe Set 2** |  |  |
| 9/10F  9/10R  9/10P | 5’ TCATCGTTGCCAACACAATGC 3’  5’ GGCGGTGAGGGCTGT 3’  5’ ACGGACAGATGTCCACCC 3’ | None  None  5’ 6-FAM. 3’ MGB |
| Ins/10F  Ins9/10R  Ins9/10P | 5’ GCAACGGACAGATGTGTGAGT 3’  5’ GGCGGTGAGGGCTGT 3’  5’ ACAGGCAGCCACCCCT 3’ | None  None  5’ 6-FAM. 3’ MGB |
| 8/IVS8F  8/IVSR  8IVS8P | 5’ CCAAGATTGACAACCTGTTGCA 3’  5’ CACTGTGTGAGGCCTGTCT 3’  5’ TTGGCACGGACCTCC 3’ | None  None  5’ 6-FAM. 3’ MGB |
